# Supplementary material
Source: Research Square preprint supplement (doi:10.21203/rs.3.rs-9333902/v1)
Supplement: Supplementary file 1 [file 2bc196117196e7740b018a10.docx]

**Supplementary Information**


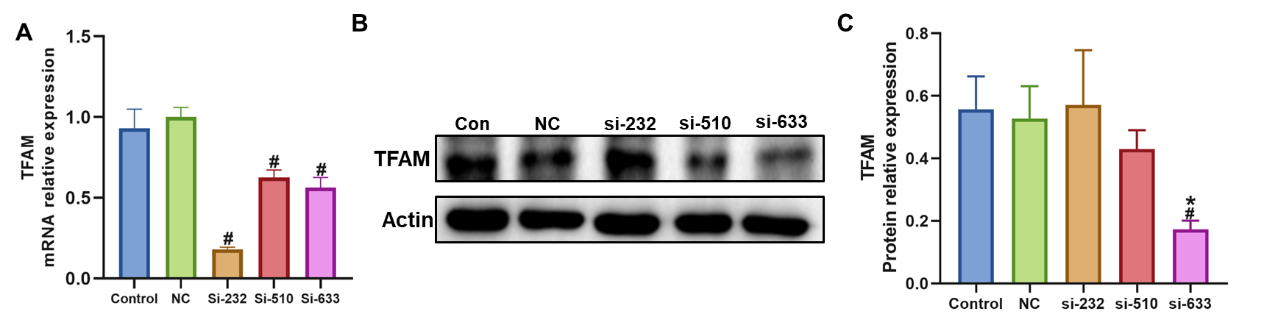


**Supplementary Figure 1**

**Establishment of the cellular interference model.** (A) Expression levels of TFAM mRNA in each cell group. (B) TFAM protein expression assessed using Western Blotting (WB), with Actin protein serving as a loading control. (C) Statistical analysis of the protein expression levels of TFAM. According to WB and RT-qPCR, the interference sequence si-633 has a better effect.


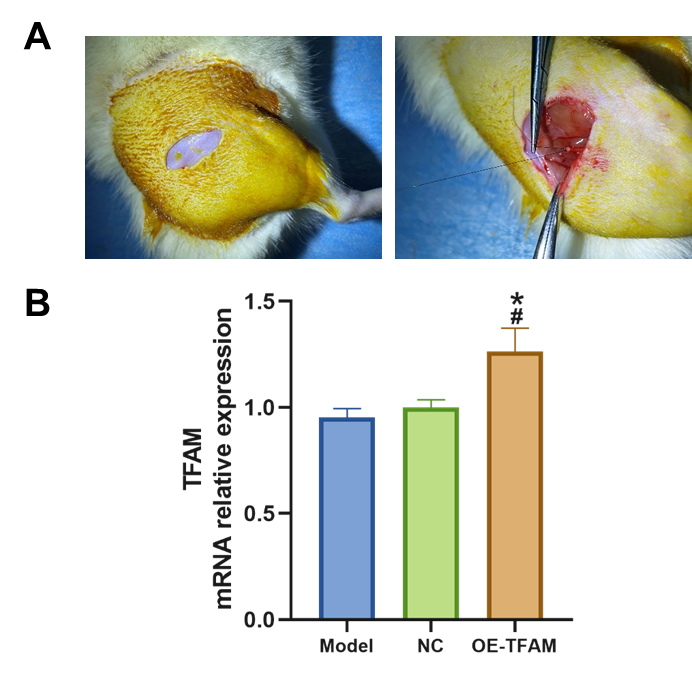


**Supplementary Figure 2**

**Establishment of Animal Models.** A. Establishment of skin incision and denervation models; B. Expression levels of TFAM mRNA in each group.
