# Supplementary material
Source: Research Square preprint supplement (doi:10.21203/rs.3.rs-9333902/v1)
Supplement: Supplementary file 2 [file 61336e85f9ddb4536e141998.docx]

**
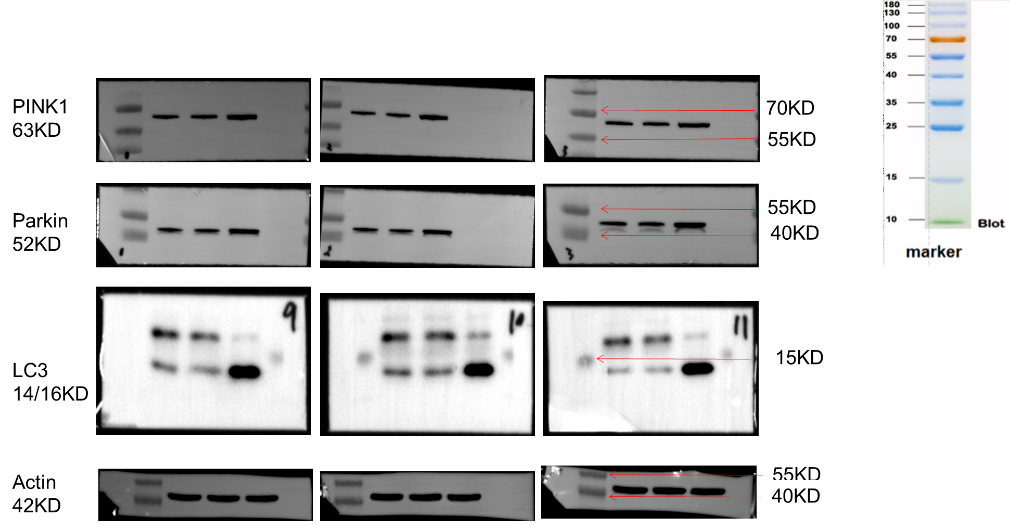
**

Fig.1. LC3Ⅱ/Ⅰ, PINK1, and Parkin protein levels assessed using Western blotting (in vitro), with Actin protein serving as a loading control.

**
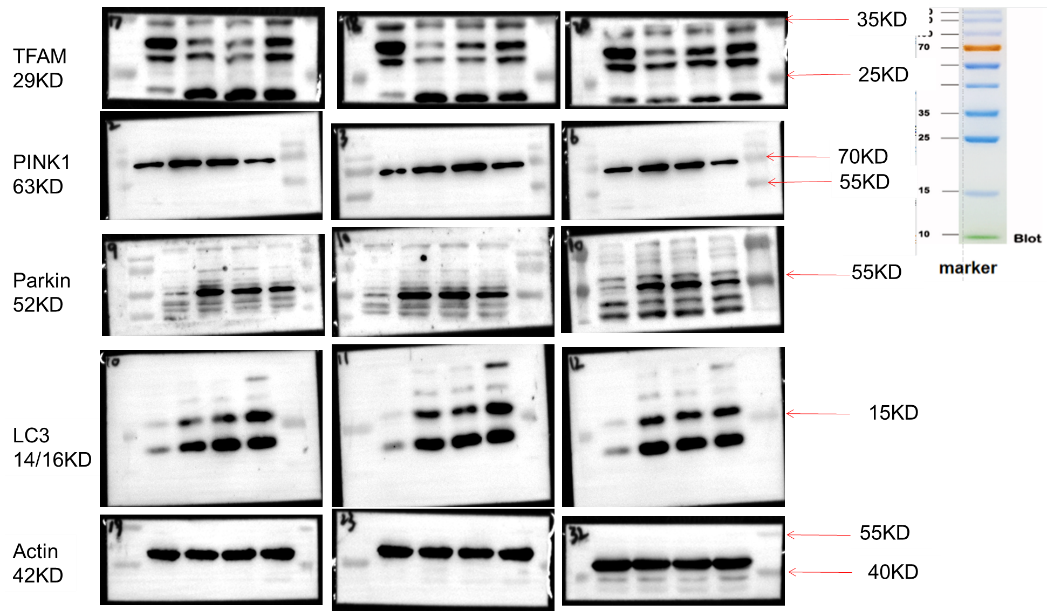
**

Fig.2. TFAM, LC3Ⅱ/Ⅰ, PINK1, and Parkin protein levels assessed using Western blotting (in vivo), with Actin protein serving as a loading control.
